# Supplementary material for: Economic Interplay Forecasting Business Success
Source: Hindawi journal article supplement (doi:10.1155/2021/8861267), 2021-01-01
Supplement: f1 [file 8861267.f1.pdf]

## Supporting information

**Fig. S1. Distribution differences** Normalized distributions of Funding, Indegree, Outdegree and Betweenness. All network centrality distributions are significantly different from the funding one: Indegree ( $p \sim 10^{-16}$ ), Outdegree ( $p \sim 10^{-6}$ ), Betweenness ( $p \sim 10^{-4}$ ).

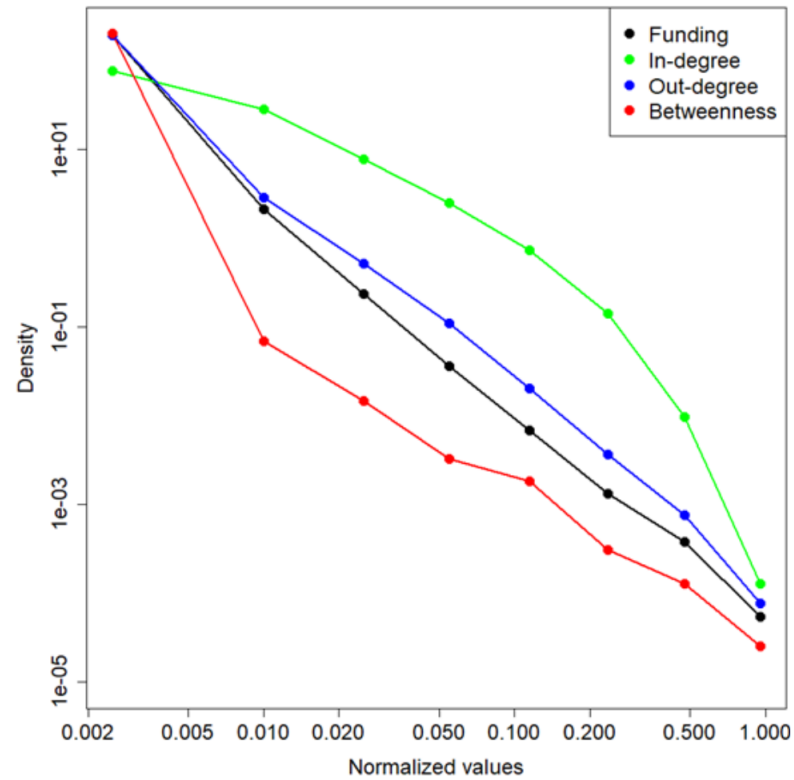

Fig. S2-a. Comparison between Indegree and Funding distributions for Nationality.

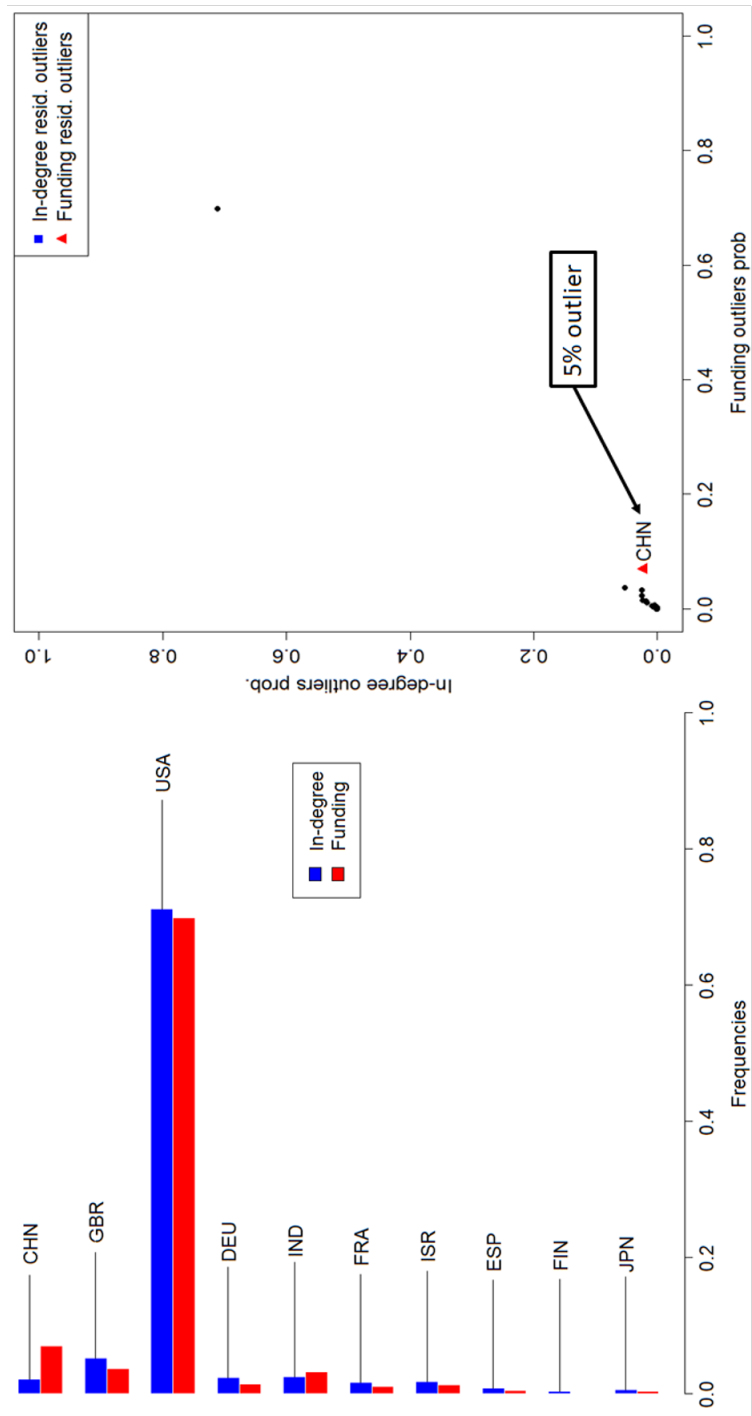

Fig. S2-b. Comparison between Indegree and Funding distributions for Investor Type.

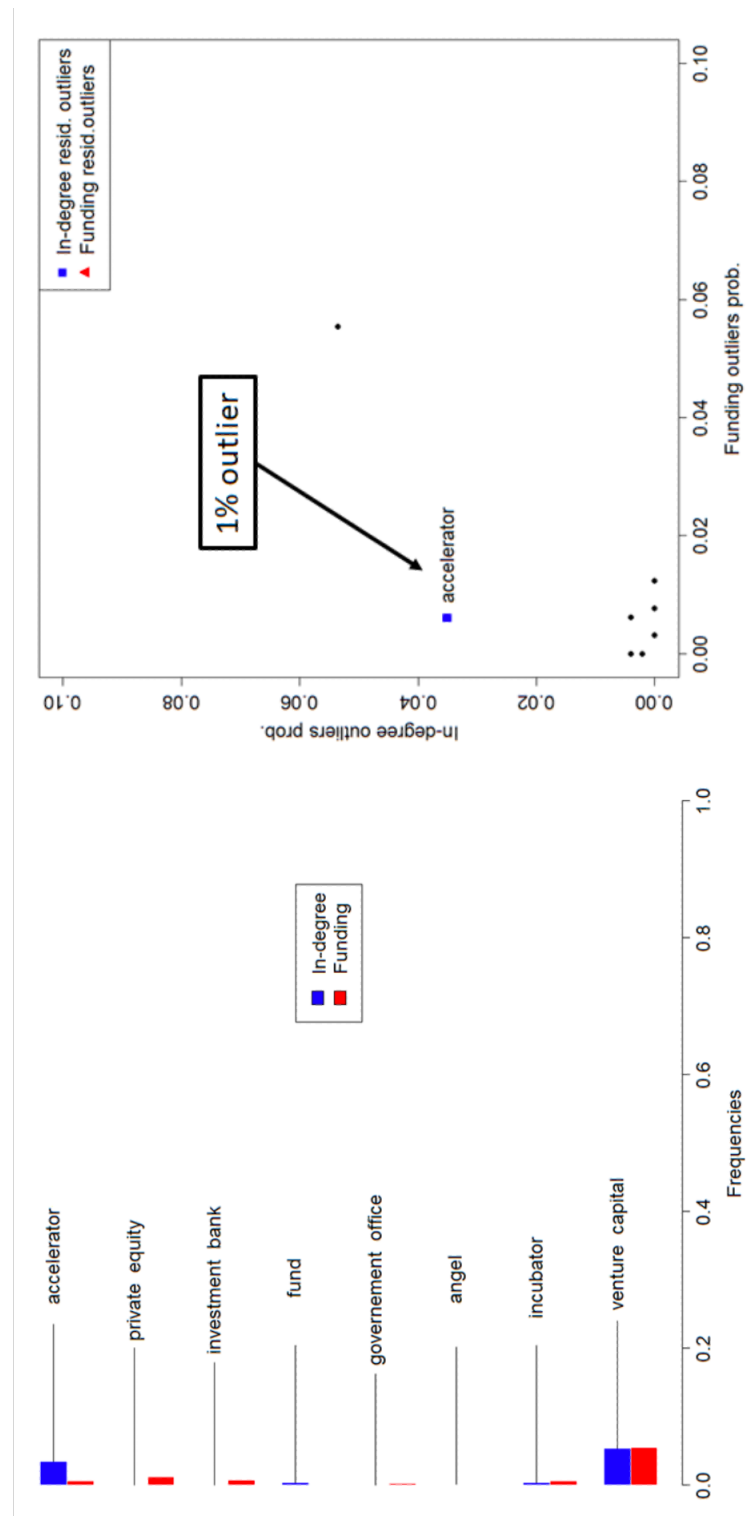

Fig. S2-c. Comparison between Indegree and Funding distributions for Economic Category.

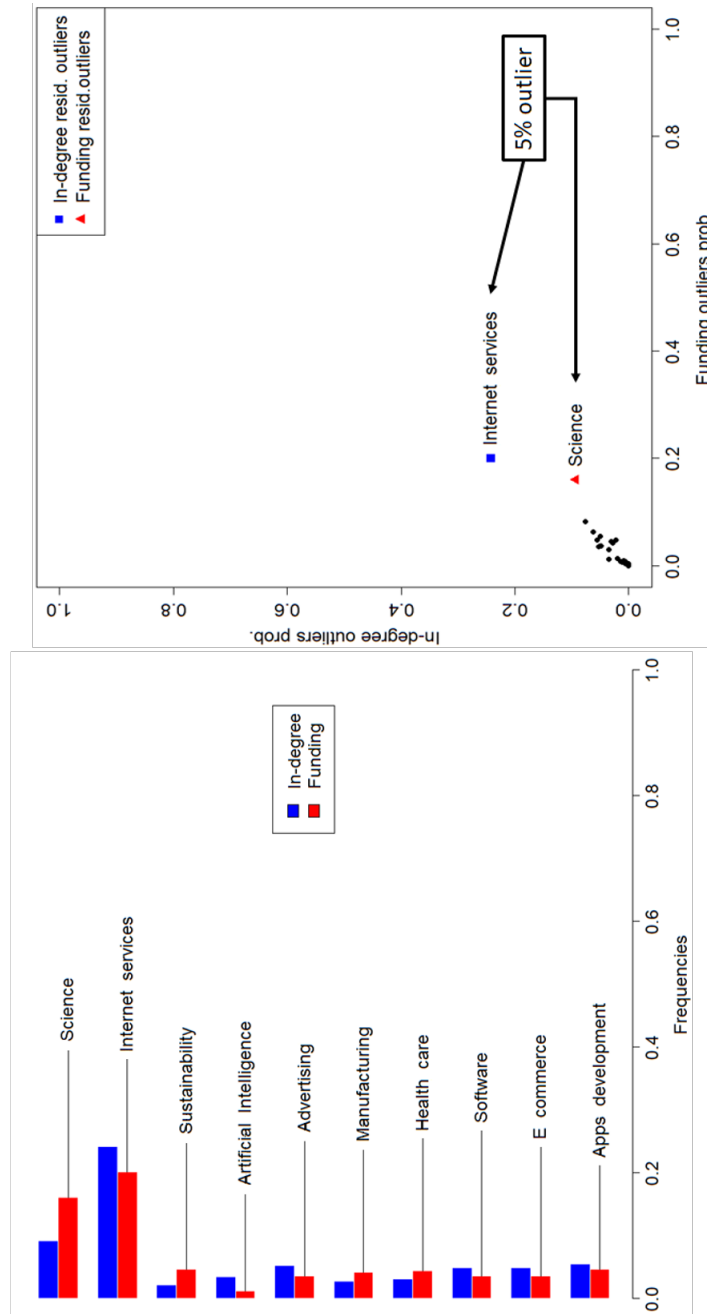

Fig. S3-a. Comparison between Outdegree and Funding distributions for Nationality.

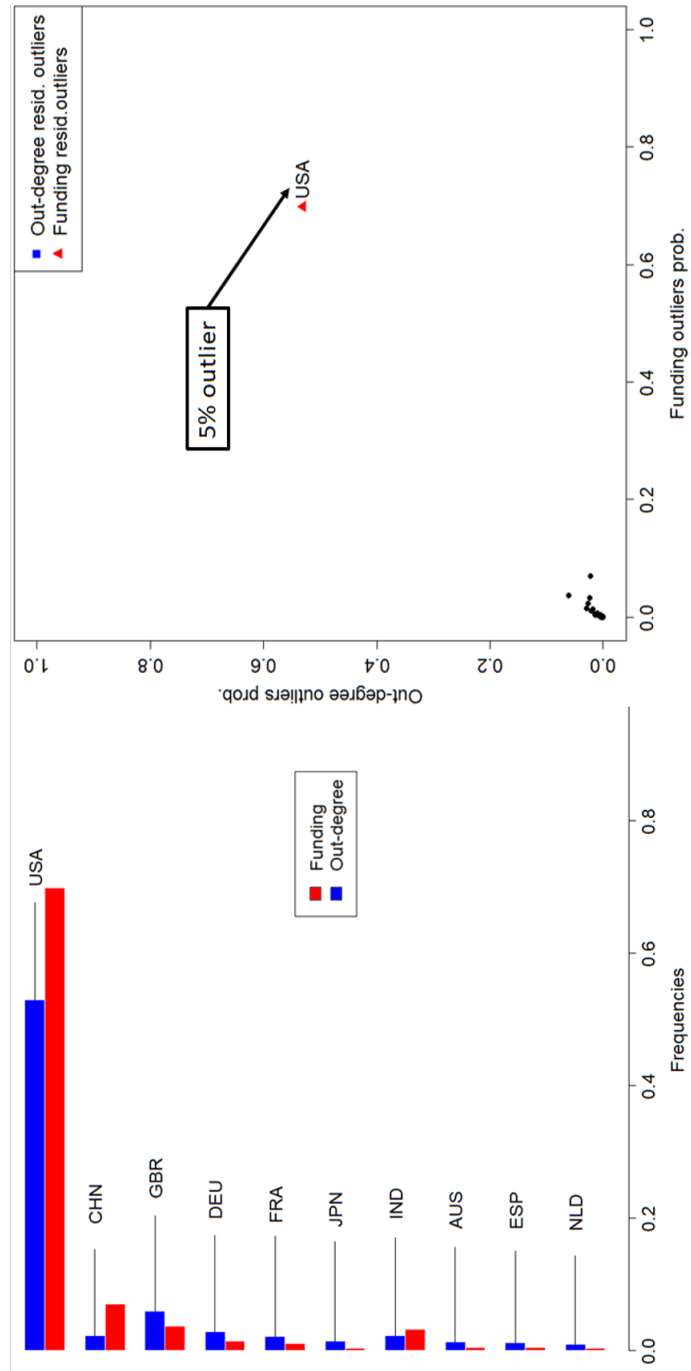

Fig. S3-b. Comparison between Outdegree and Funding distributions for Investor Type.

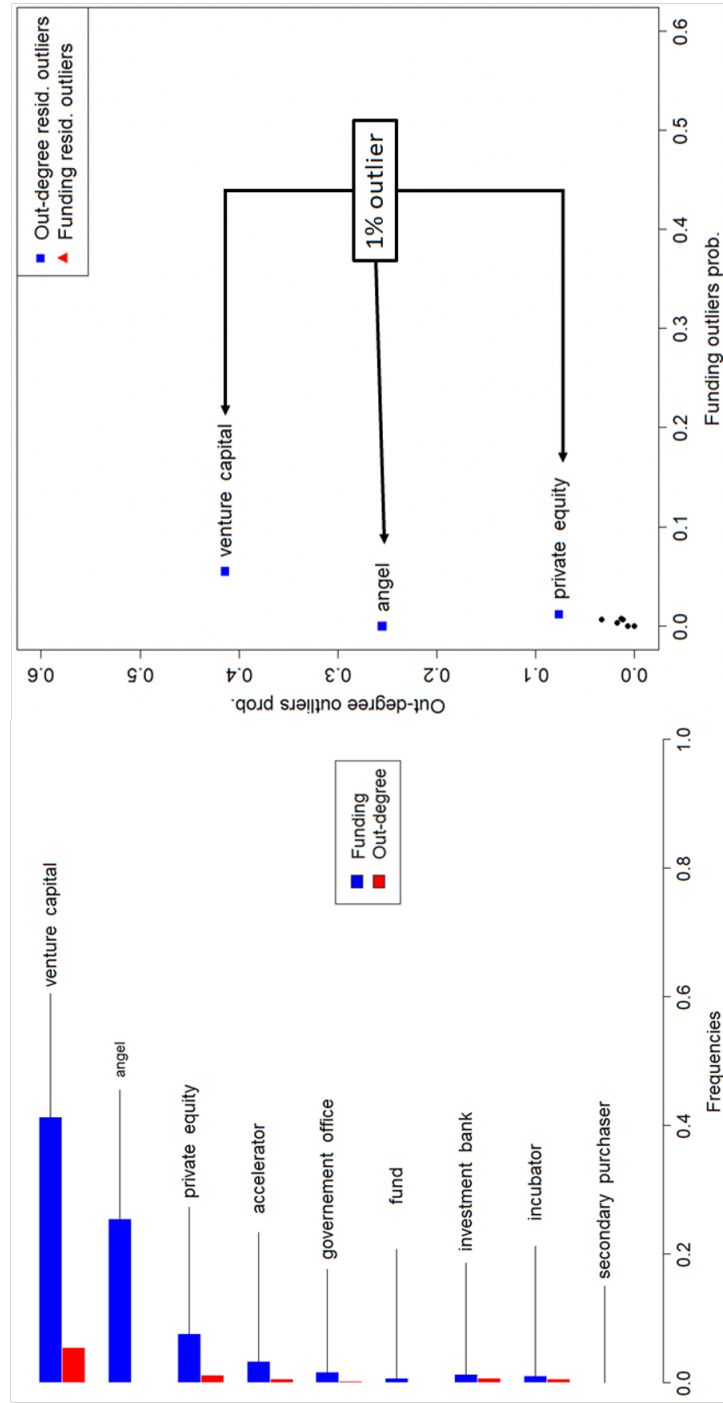

Fig. S3-c. Comparison between Outdegree and Funding distributions for Economic Category.

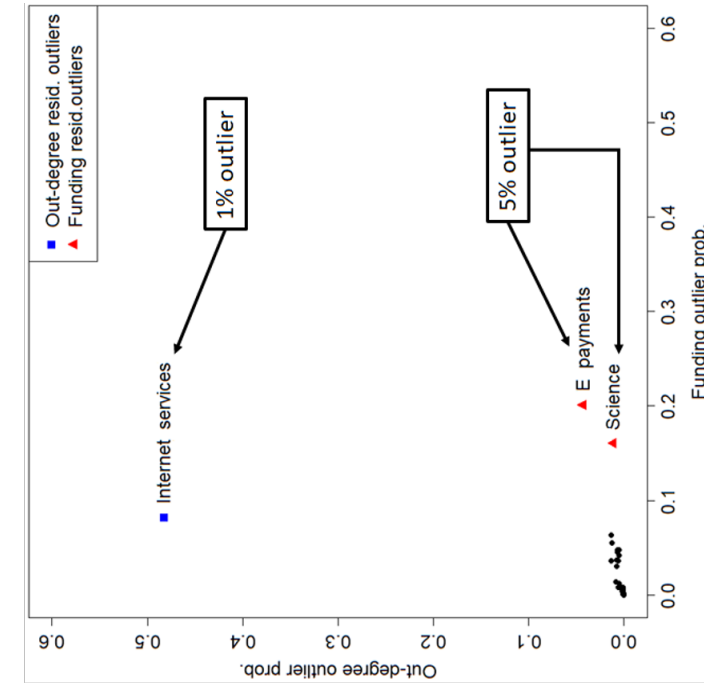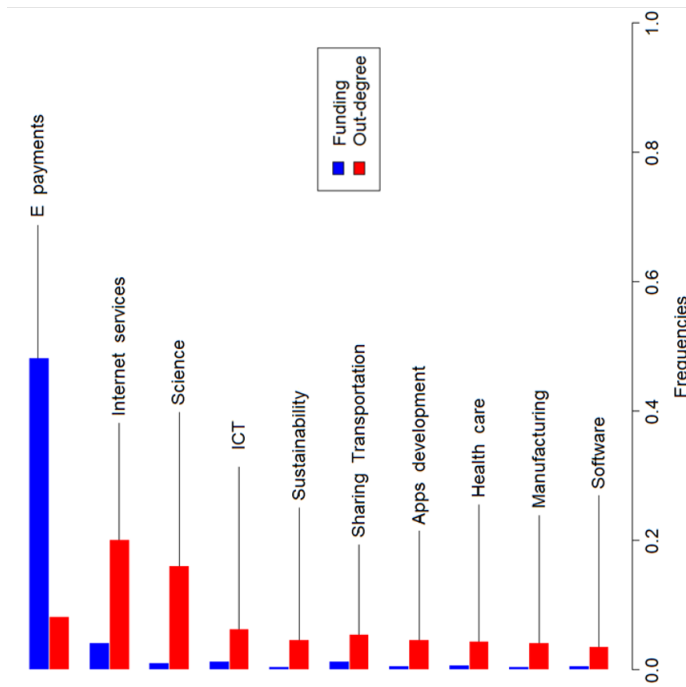

Fig. S4-a. Comparison between Betweenness and Funding distributions for Nationality.

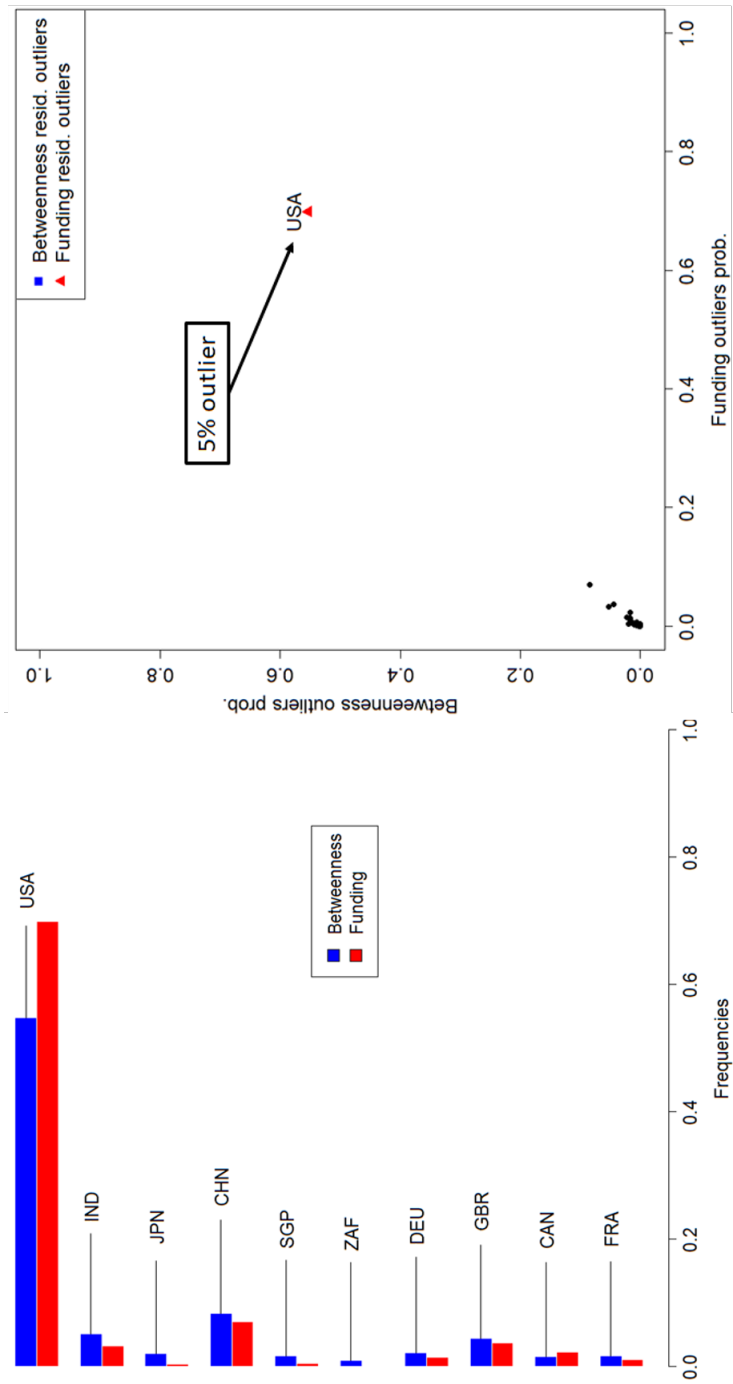



Fig. S4-b. Comparison between Betweenness and Funding distributions for Investor Type.

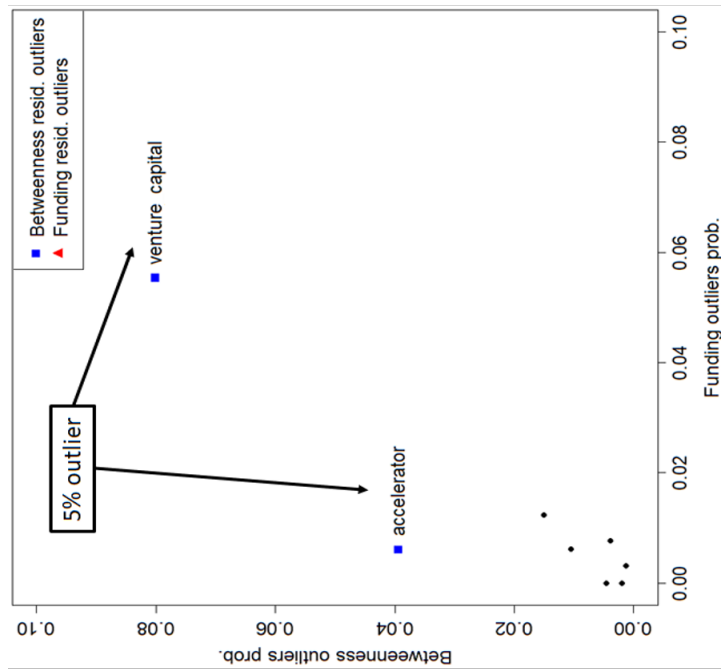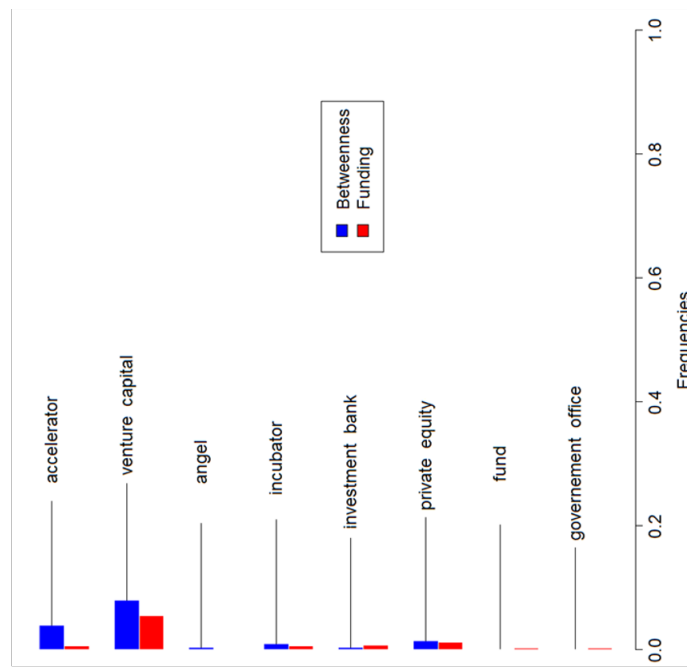

Fig. S4-c. Comparison between Betweenness and Funding distributions for Economic Category.

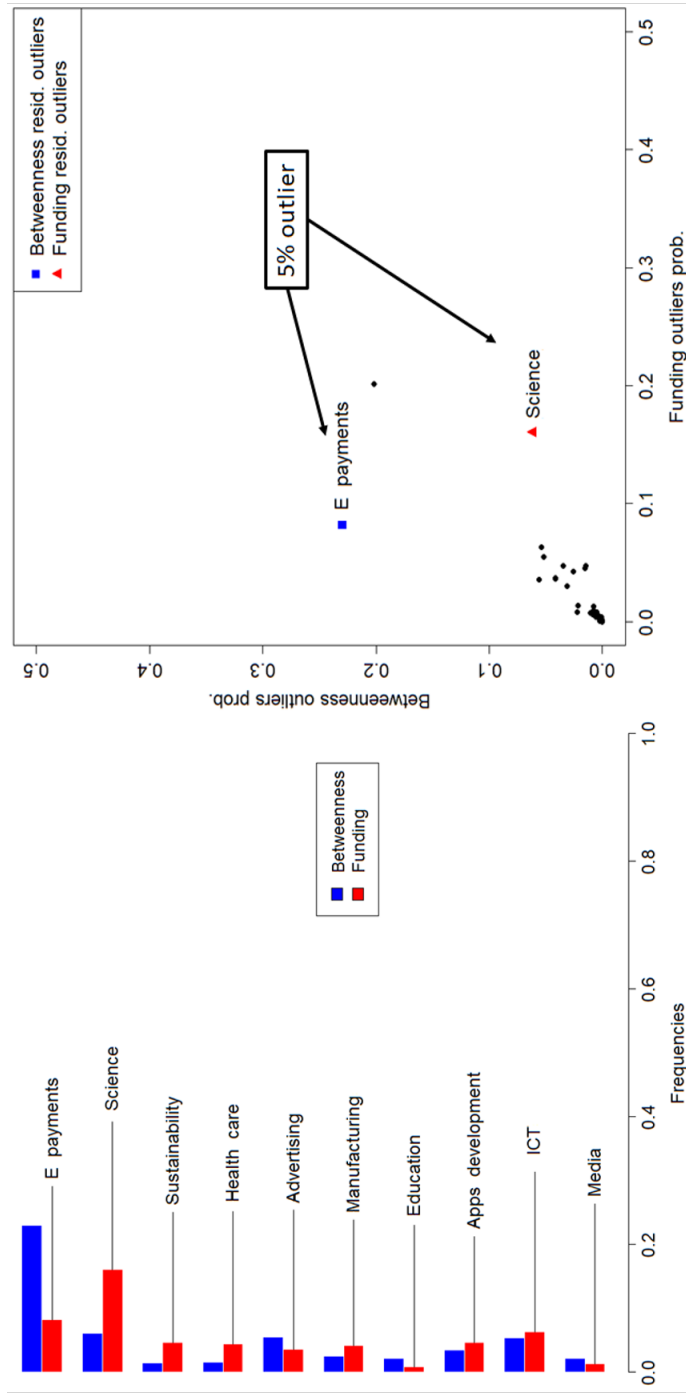

Fig. S5-a. AUC-ROC for the coarse Economic Categories, part 1.

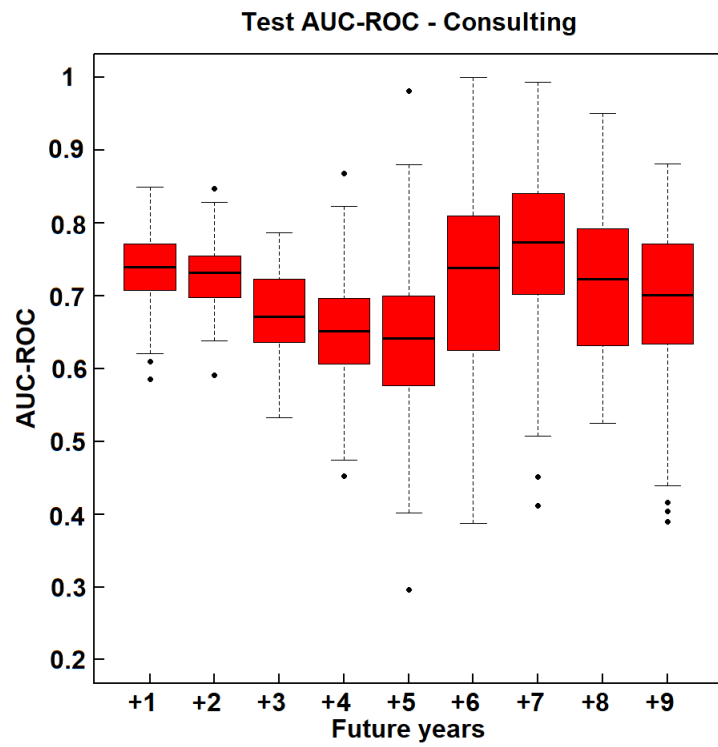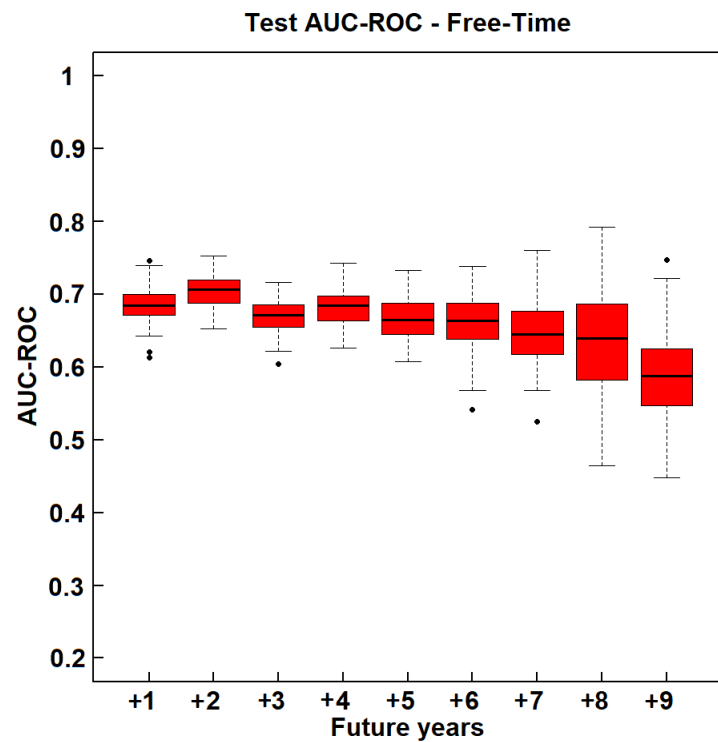

Fig. S5-b. AUC-ROC for the coarse Economic Categories, part 2.

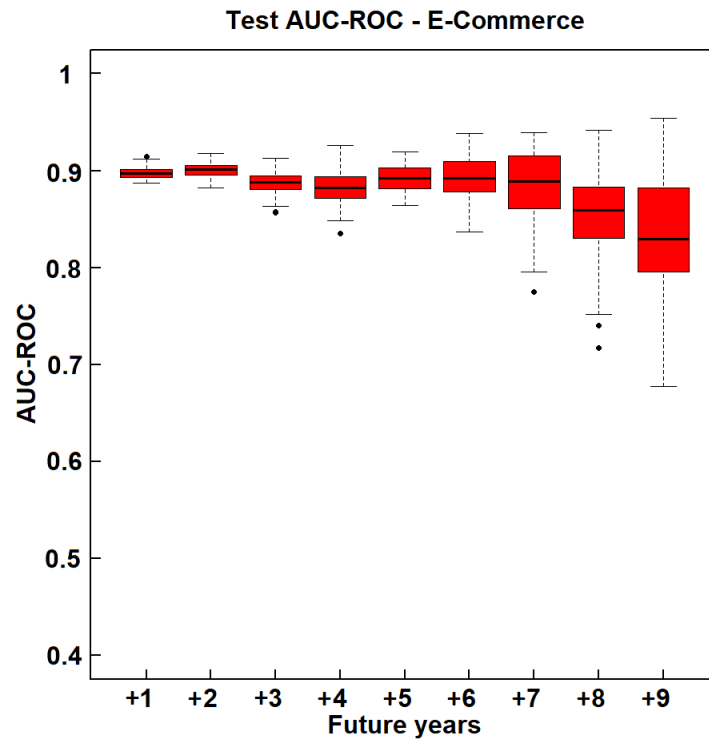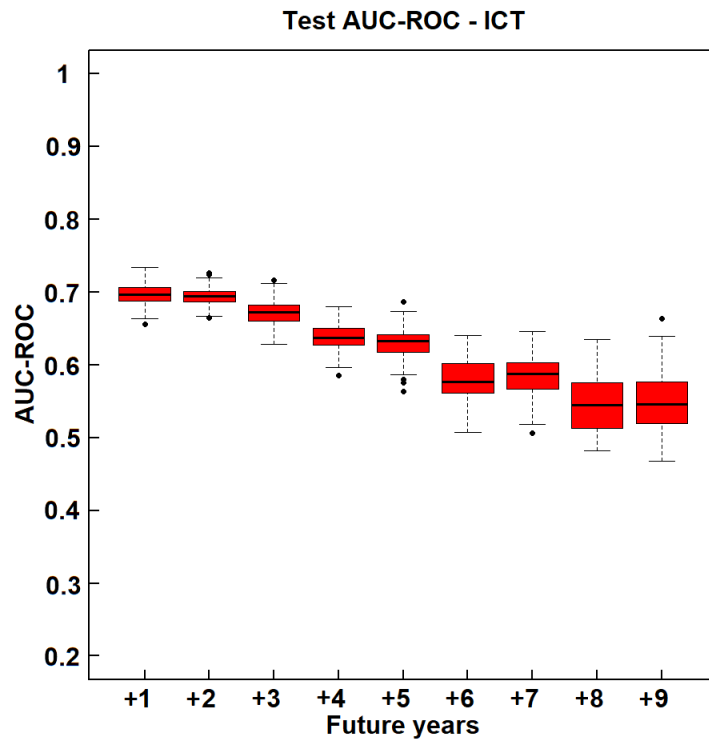

Fig. S5-c. AUC-ROC for the coarse Economic Categories, part 3.

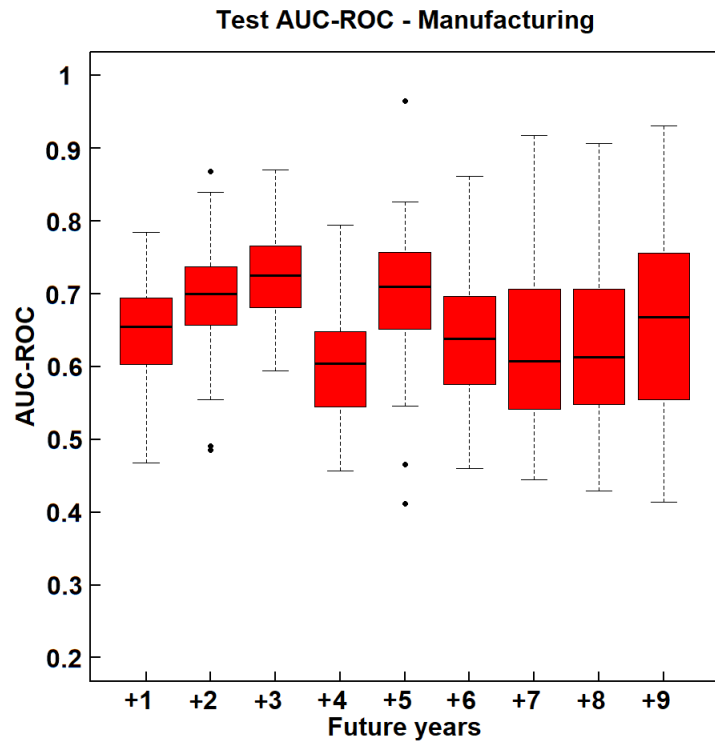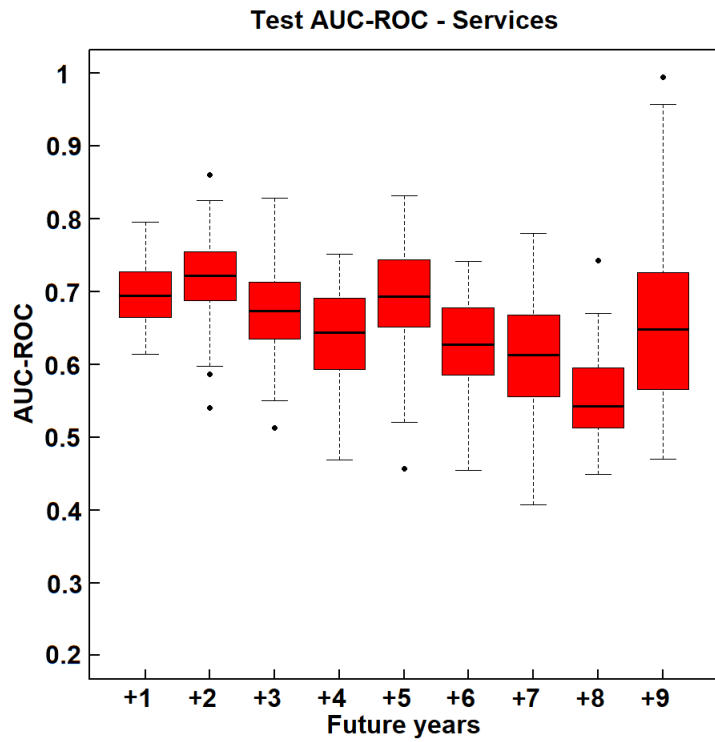

Fig. S5-d. AUC-ROC for the coarse Economic Categories, part 4.

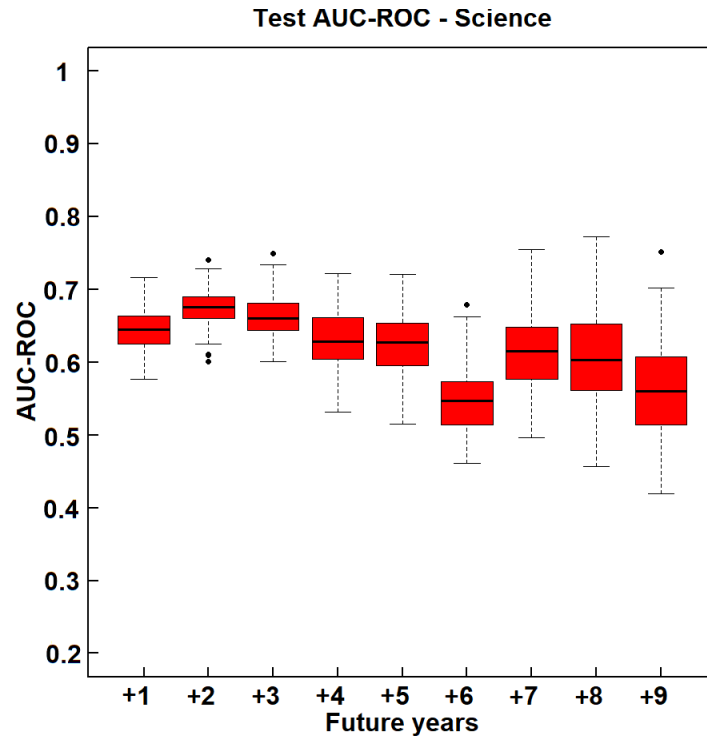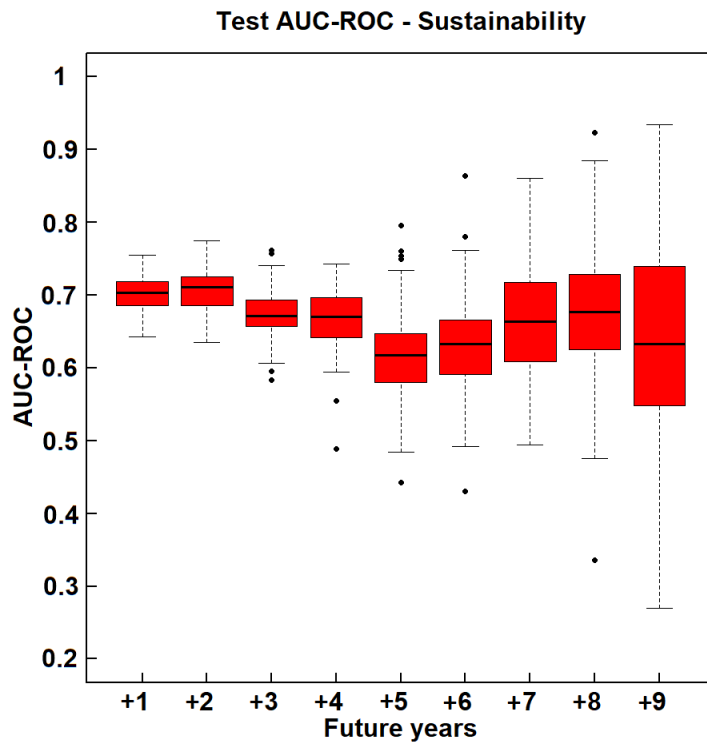

Fig. S6-a. Sensitivity and Specificity for the coarse Economic Categories, part 1.

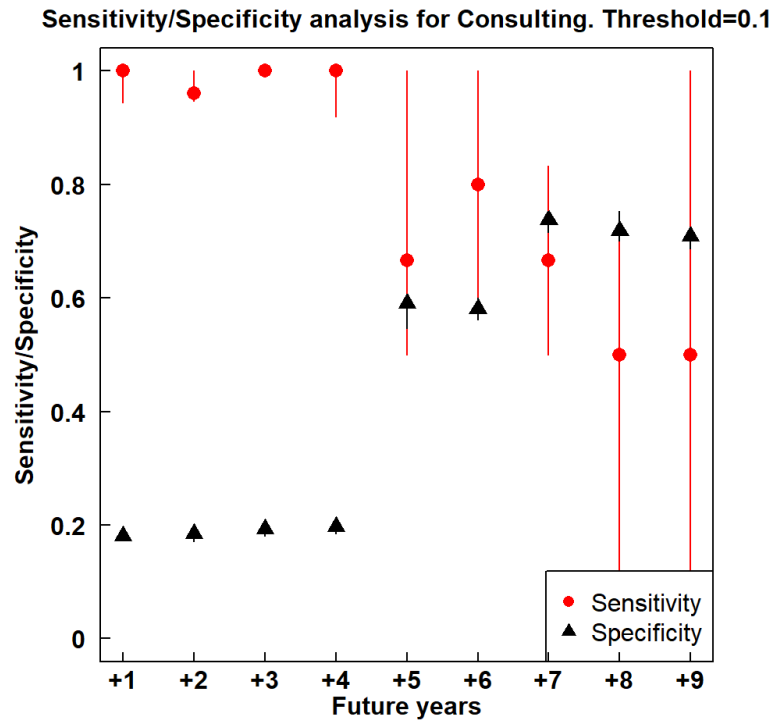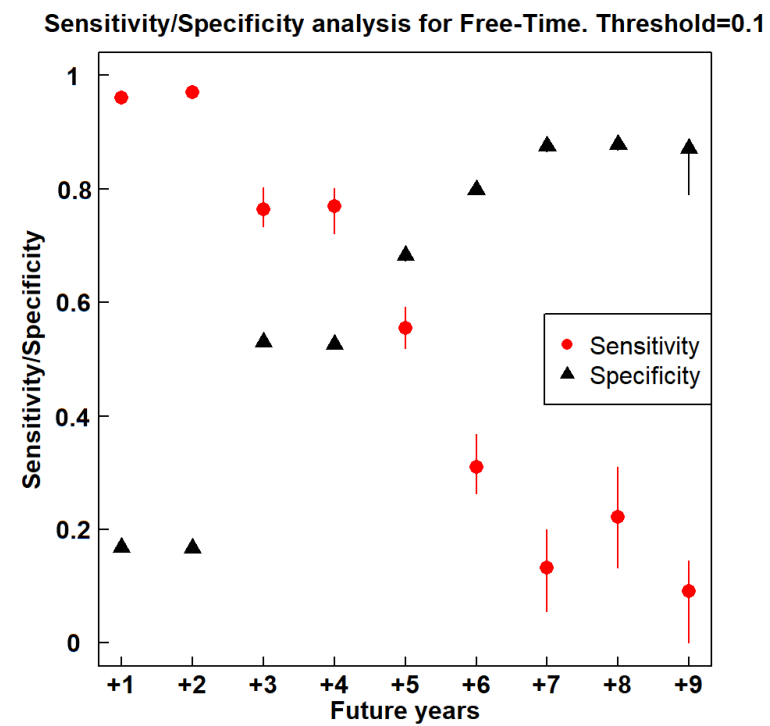

Fig. S6-b. Sensitivity and Specificity for the coarse Economic Categories, part 2.

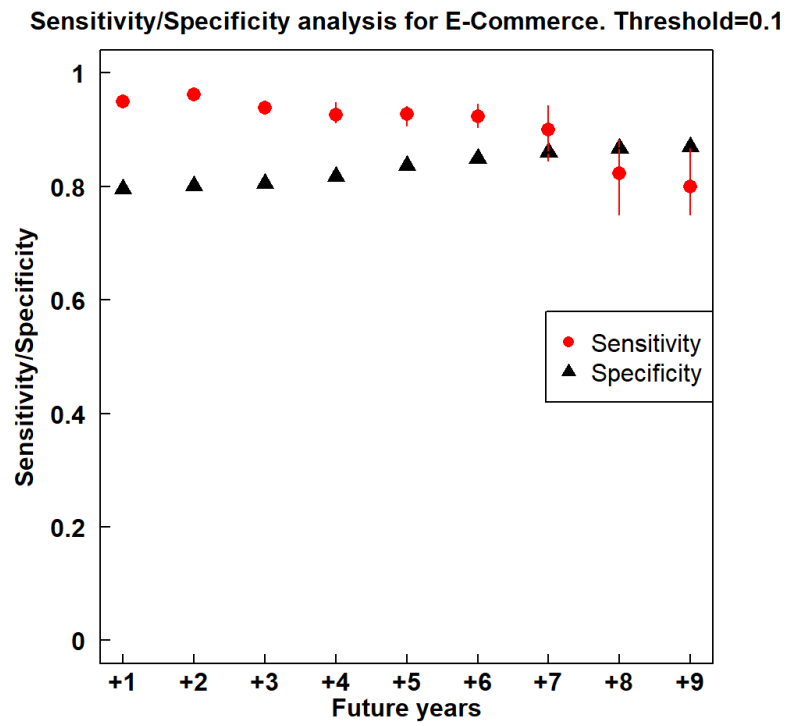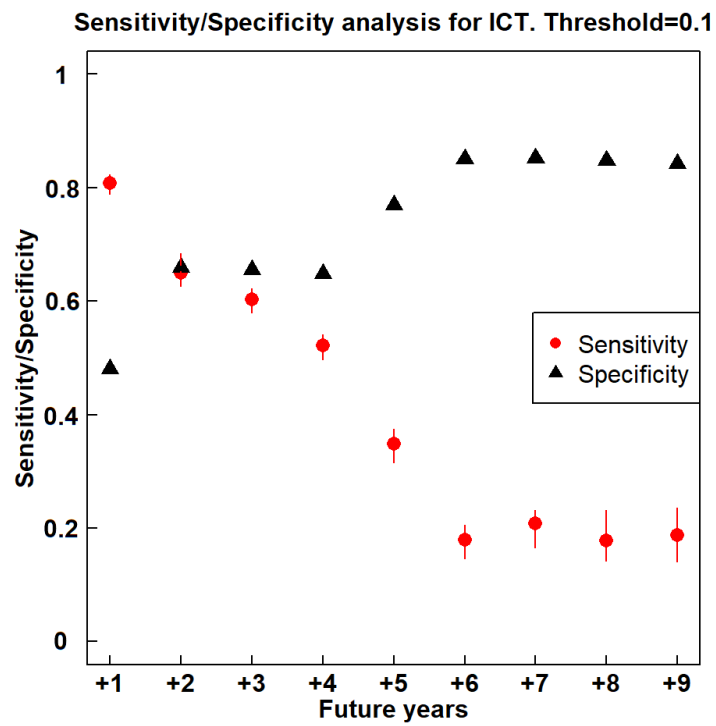



Fig. S6-c. Sensitivity and Specificity for the coarse Economic Categories, part 3.

Sensitivity/Specificity analysis for Manufacturing. Threshold=0.1

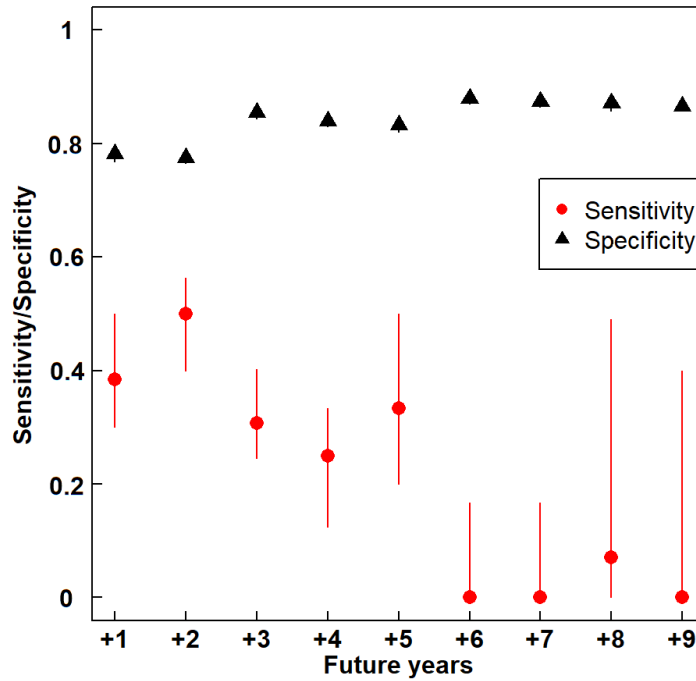

Sensitivity/Specificity analysis for Services. Threshold=0.1

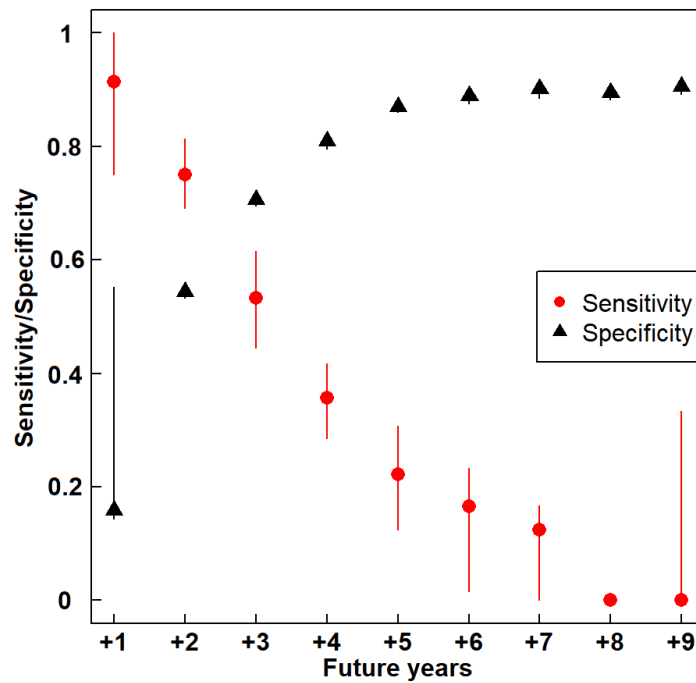

Fig. S6-d. Sensitivity and Specificity for the coarse Economic Categories, part 4.

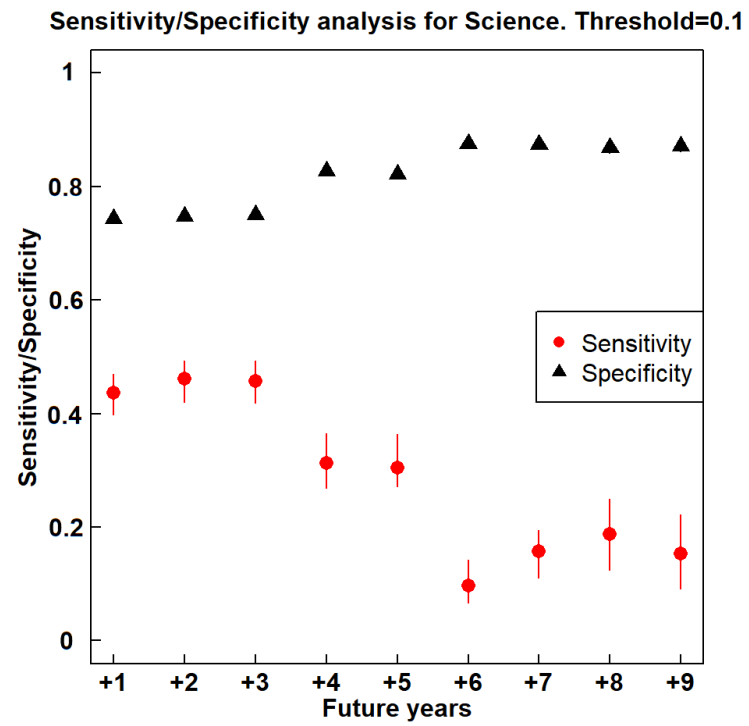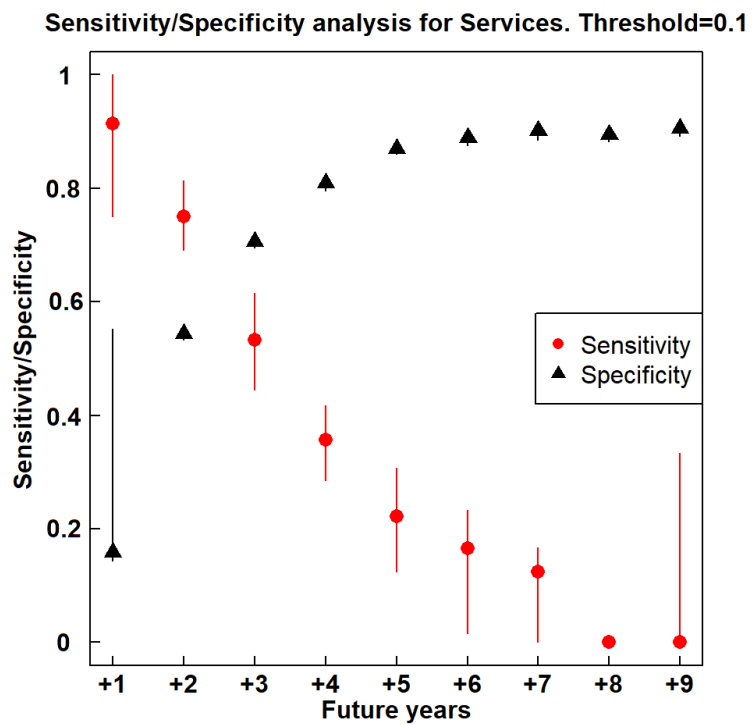

## Appendix S1. Statistical analyses.

By definition, an outlier is an observation exceeding a distance of  $1.5 IQR(X)$  from the first and third quartiles of its distribution  $X$ , where  $X =$  funding, in-degree, out-degree and betweenness. Funds and centrality measures have long-tail distributions with large skewness and this feature may entail an overestimation of outliers. To tackle this issue, we bootstrapped the experimental distributions ten thousands of times, estimated each time the left and right outlier thresholds and finally averaged these results. Accordingly, only observations exceeding these robust averaged left and right thresholds were identified as outliers.

All statistical tests performed in this work are non-parametric Kolmogorov-Smirnov tests. Calculated p-values were corrected according to multiple hypothesis testing with Bonferroni correction. We are aware this choice can be too conservative in many applications, however in this study we aimed at presenting a tool to quantitatively evaluate importance and the strategic nature of some elements, more than existing differences; although the interested reader can evaluate all existing differences and perspectives enlightened by our approach. We preferred limiting our discussions to those significant according to the most stringent criterion provided by Bonferroni.

Finally, to evaluate the effect of centrality measures on funding outliers, we considered centrality measures for each year, from 2000 to 2017 and assigned the label 1 to those firms resulting funding outliers in the future 1, 2, ..., 10 years. Thus we obtained 10 distinct datasets  $d_i$ ; for each one we performed 100 10-fold cross-validation analyses to determine the model accuracy: we randomly split a dataset  $d_i$  in 10 parts, one part was used for validation, the remaining ones for training.

The findings presented in this work exploit the informative content provided by aggregate funds collected by each firm until 2017. However, another possibility would consist in considering funds collected year by year. We chose to consider aggregate funding to maximize the information provided by Crunchbase data. Accordingly, we were able to take into account:

- the information deriving from the overall temporal series of collected funds and exploiting it to obtain an accurate model of success;
- the economic interplay established over time and lasting bonds which therefore shape the network structure;

Considering funds collected over a long temporal range makes the aggregate network less sensitive to statistical fluctuations, which on the contrary would be significant when considering only one year of funds. Aggregating funds and therefore connections weakens the weight of each year with respect of the whole time series; the longer the series, the weaker the importance of each year. Therefore, aggregating information can be useful to explore global trends and strengthen the model robustness.

To avoid any bias when estimating prediction accuracy, we excluded that information from the model by considering only the collected funds dating back to a year earlier, tow years earlier and so on.

**Table S1. Organization of Crunchbase data.**

| File Name                     | Short Description                                    |
|-------------------------------|------------------------------------------------------|
| 1. Acquisitions               | Data about acquisitions                              |
| 2. Category_groups            | A list of all economic categories within the data    |
| 3. degrees                    | Educational qualification of tracked people          |
| 4. event_appearances          | events and participating people                      |
| 5. events                     | A list of all recorded events                        |
| 6. funding_rounds             | Description of funding rounds                        |
| 7. funds                      | The file includes all present investment funds       |
| 8. investment_partners        | partnerships established in funding rounds           |
| 9. investments                | Information about leader investors in funding rounds |
| 10. investors                 | A description of all Crunchbase investors            |
| 11. ipos                      | Firms at initial public offering stage               |
| 12. jobs                      | Job career of tracked people                         |
| 13. org_parents               | The list of subsidiaries and controller companies    |
| 14. organization_descriptions | Description of firm activities                       |
| 15. organizations             | A detailed description of all Crunchbase firms       |
| 16. people                    | A list of all people in Crunchbase                   |
| 17. people_description        | A description of tracked people                      |

**Table S2. Top ten ranking.**

| Ranking | Nationality | Economic category             | Investor type                |
|---------|-------------|-------------------------------|------------------------------|
| 1.      | USA (53.6%) | Internet services (19.3%)     | Angel (60.4%)                |
| 2.      | UK (7.6%)   | e-Payments (14.4%)            | Venture Capital (27.8%)      |
| 3.      | IND (4.2%)  | Software (6.1%)               | Private equity (6.2%)        |
| 4.      | CAN (3.0%)  | Science (5.8%)                | Accelerator (1.9%)           |
| 5.      | CHI (2.9%)  | ICT (5.6%)                    | Government Office (1.1%)     |
| 6.      | DEU (2.8%)  | e-Commerce (5.0%)             | Incubator (1%)               |
| 7.      | FRA (2.3%)  | Sharing transportation (4.4%) | Investment bank (0.9%)       |
| 8.      | ISR (1.7%)  | Apps development (4.3%)       | Fund (0.5%)                  |
| 9.      | AUS (1.5%)  | Healthcare (4.1%)             | Secondary purchaser (0.03%)  |
| 10.     | ESP (1.3%)  | Advertising (3.9%)            | Startup competition (0.003%) |

**Table S3. Top fifty ranking.**

| Rank | Funding                | Indegree         | Outdegree                     | Betweenness        |
|------|------------------------|------------------|-------------------------------|--------------------|
| 1.   | Verzion Comm.          | Uber             | 500 Startups                  | Y Combinator       |
| 2.   | Tsinghua Unigr. Int.   | Atrium LTS       | Y Combinator                  | FundersClub        |
| 3.   | Didi Chuxing           | Flexport         | Sequoia Capital               | Techstars          |
| 4.   | Tesla                  | DocuSign         | New Enterprise Associates     | StartX             |
| 5.   | China Unicom           | Pinterest        | Intel Capital                 | Alibaba            |
| 6.   | Uber                   | SeatGeek         | Accel Partners                | Alchemist Accel.   |
| 7.   | Rosneft                | Opendoor         | NYSERDA                       | Groupon            |
| 8.   | WeWork                 | CardioDx         | Kl. Perk. Cauf. & Byers       | Salesforce         |
| 9.   | AT&T Wir. Mob. Gr.     | Lyft             | SOSV                          | Google             |
| 10.  | Alibaba                | Prosper          | Wayra                         | Crowdcube          |
| 11.  | Meituan-Dianping       | Fab              | Draper Fisher Jurvetson (DFJ) | Seedcamp           |
| 12.  | Flipkart               | Mattermark       | SV Angel                      | Betaworks          |
| 13.  | Clearwire              | ActiveNetwork    | Start-Up Chile                | Startupbootcamp    |
| 14.  | Hilton Worldwide       | TransMedics      | Bessemer Venture Partners     | Seedrs             |
| 15.  | Apple                  | Tesla            | Techstars                     | WR Hambrecht       |
| 16.  | SH Pudong Dev. Bank    | Practice Fusion  | Right Side Cap. Manag.        | Baidu              |
| 17.  | Sberbank               | Domo             | Technology Development Fund   | DST Global         |
| 18.  | COFCO                  | Neuronetics      | Greylock Partners             | AngelList          |
| 19.  | Jumpstart Ltd          | PTC Therapeutics | First Round Capital           | 500 Startups       |
| 20.  | Charter Comm.          | Airbnb           | Goldman Sachs                 | AOL                |
| 21.  | Ping An                | EndoGastric Sol. | Index Ventures                | Tencent Hld.       |
| 22.  | Suning                 | ecomom           | Lightspeed Venture Partners   | Digital Curr. Gr.  |
| 23.  | Ant Financial          | Artsy            | Battery Ventures              | Slack              |
| 24.  | Airbnb                 | Bluesmart        | Plug and Play                 | Amplify.LA         |
| 25.  | Gas Natural            | Scopely          | High-Tech Gruenderfonds       | Yahoo              |
| 26.  | Nvidia                 | Namely           | Crowdcube                     | Visionplus         |
| 27.  | Evonik Industries      | Pivot3           | Brand Capital                 | Rock Health        |
| 28.  | First Data Corp.       | Sun Basket       | Venrock                       | OurCrowd-GCai      |
| 29.  | Grab                   | Keen IO          | Andreessen Horowitz           | Didi Chuxing       |
| 30.  | Ele.me                 | Memebox Corp.    | Benchmark                     | JFDI.Asia          |
| 31.  | AccorHotels            | Klout            | General Catalyst              | CircleUp           |
| 32.  | Xerox                  | Boxed            | Khosla Ven.                   | Amazon             |
| 33.  | Allegro                | Spotify          | Norwest Ven. Ptrs - NVP       | Anthemis Group     |
| 34.  | Toys —R—               | Meru Networks    | GV                            | Cisco              |
| 35.  | Toutiao                | Doppler Labs     | Redpoint                      | Kickstarter        |
| 36.  | Ola                    | Casper           | Menlo Ventures                | Uber               |
| 37.  | Reliance Jio Inf. Ltd. | Kamcord          | Canaan Partners               | Xiaomi             |
| 38.  | B2M Solutions          | Proterra         | Atlas Venture                 | Lighter Capital    |
| 39.  | Magic Leap             | Actelis Networks | Northstar Ventures            | SeedInvest         |
| 40.  | Roche                  | Luxe             | Matrix Partners               | Entrepreneur First |
| 41.  | Lazada Group           | Calient Tech.    | Pol. Partners                 | LetsVent.          |
| 42.  | Snap Inc.              | Slack            | U.S. Venture Ptrs (USVP)      | Garage Tech. Ven.  |
| 43.  | Lyft                   | GENBAND          | Seedrs                        | PayPal             |
| 44.  | Safaricom              | Black Duck Sw.   | Silicon Valley Bank           | Snapdeal           |
| 45.  | Delivery Hero          | ColorChip        | Foundation Capital            | Silver Lake Ptrs   |
| 46.  | Spotify                | SpotHero         | Mayfield Fund                 | Wefunder           |
| 47.  | Univ. Studios Jp.      | Path             | Kima Ventures                 | Imagine K12        |
| 48.  | Infor                  | Optimizely       | IDG Capital Partners          | Rocket Internet    |
| 49.  | One97 Comm.            | Beepi            | Startupbootcamp               | HIGHLIGHTvc        |
| 50.  | Xiaomi                 | LeadGenius       | CRV                           | One97 Comm.        |

## Appendix S2. Firm-level variables in the Crunchbase dataset

Although the focus of our model is to investigate and quantify the relationship between network centralities and the ability of startups to obtain funding in funding rounds, it is natural to wonder to what extent specific firm-level variables affect the classifier’s performance. To answer this question, in Section ?? we developed a variant of the original model, obtained by combining both network centralities and categorical variables that characterize the startups available in the Crunchbase dataset. In particular, the firm-level variables that we considered in this task are as follows:

- Investor type. 34 619 of the 121 950 subjects in Crunchbase are actually investors, belonging to one of the following 10 categories: angel (20 930), venture capital (9 619), private equity (2 153), accelerator (667), government office (397), incubator (331), investment bank (322), fund (188), secondary purchaser (11) and startup competition (1). However, the value of this variable is not available in around 71.6% of the cases, indicating that the corresponding elements are not investors.
- Coarse economic category. The economic categories, available in Crunchbase for 81 322 economic subject out of 121 950 (66.7%), are numerous and too specific for some tasks: in a classification problem, some categories are underrepresented and cannot be efficiently employed. For this reason, we introduce 8 coarse economic categories, in which the original refined categories are grouped: Public services, Media and free time, ICT and Computer Science, Science, E-services, Consulting, Engineering and manufacturing, Green economy. A detailed review of the correspondence between the fine (38 categories) and coarse (8 categories) subdivisions is reported in Tab. S4 Table in Supplementary Information.
- Country development groups. Information on nationality is available for 104 628 economic subjects out of the 121 950 surveyed in Crunchbase (85.8%). Although these companies are based in a large number of countries (160), the geographical distribution of Crunchbase elements is extremely inhomogeneous, as we already observed in Section ?. For this reason, using nationality of Crunchbase subjects as a categorical feature to predict funding would be unfeasible. However, since geographical information could be relevant in determining the ability of a startup in collecting funds, we applied the same logic as for the economic categories, grouping the 160 countries in 4 development groups. Such a partition is obtained in Ref. [?] by applying community detection to a complex network of United Nations Member States (UNMS), constructed from World Bank development indicators<sup>1</sup>. The vast majority (76.5%) of economic subjects in Crunchbase belongs to the most developed group, while the remainder is divided among the upper-middle development group (3.1%), the lower-middle development group (4.8%), the least developed one (0.6%) and subjects which are not assigned to any development group because their nationality is either missing in Crunchbase (14.2%) or not included in the UNMS set (0.9%).
- Employee count. Crunchbase also contains information on the size of 59 655 companies (48.9% of the cohort), quantified by a categorical variable related to the number of employees, that can fit into 9 different ranges: 1–10 employees (20 373 firms), 11–50 (21 560), 51–100 (6974), 101–250 (2396), 251–500 (2010), 501–1000 (2362), 1001–5000 (1405), 5001–10 000 (992), over 10 000 (1583).

Before training the classifier on the combined set of centrality metrics and firm-level features, the categorical variables were preprocessed to properly manage missing entries. Since missing entries in the Investor type value correspond to non-investor startups, we

---

<sup>1</sup><https://databank.worldbank.org>

interpreted it as a category of its own. The same treatment has been done for the missing entries of the Coarse economic category, Country development group and Employee count variables: this strategy was adopted, instead of, e.g., replacing missing entries with the mean value of the available ones, because values are expressed as ranges or categories and not as numerical values.

**S4 Table. Coarse economic category grouping.**

| Refined categories                                                                                                                                       | Cardinality                                                        | Coarse categories             | Total cardinality |
|----------------------------------------------------------------------------------------------------------------------------------------------------------|--------------------------------------------------------------------|-------------------------------|-------------------|
| Administrative services<br>Community services<br>Government office<br>Healthcare                                                                         | 563<br>167<br>86<br>3308                                           | Public services               | 4124              |
| Advertising<br>Events<br>Food and beverage<br>Media<br>Sports and travels<br>Travel<br>Video production, editing                                         | 3139<br>9<br>1407<br>2205<br>943<br>981<br>2223                    | Media and free time           | 10907             |
| Apps development<br>Content editing<br>Gaming<br>Hardware<br>ICT<br>Internet services<br>Platforms<br>Privacy services<br>Software<br>Telecommunications | 3537<br>1<br>273<br>740<br>4522<br>16079<br>4<br>246<br>4952<br>27 | ICT and Computer Science      | 30381             |
| Artificial Intelligence<br>Data Analytics<br>Education<br>Science                                                                                        | 1851<br>297<br>1808<br>4741                                        | Science                       | 8697              |
| E-commerce<br>E-payments                                                                                                                                 | 4072<br>11718                                                      | E-services                    | 15790             |
| Consumer services<br>Energy consulting services<br>Professional services<br>Real estate<br>Sales services                                                | 176<br>170<br>1027<br>1025<br>553                                  | Consulting                    | 2951              |
| Design<br>Manufacturing<br>Navigation                                                                                                                    | 177<br>2430<br>24                                                  | Engineering and manufacturing | 2631              |
| Natural resources<br>Sharing transportation<br>Sustainability                                                                                            | 309<br>3553<br>1979                                                | Green economy                 | 5841              |
